# Supplementary material
Source: PubMed Central journal article supplement (PMC2663993)
Supplement: 0806117106_0806117106SI.pdf [file 0806117106_0806117106SI.pdf]

# Supporting Information

Kemle and Sun 10.1073/pnas.0806117106

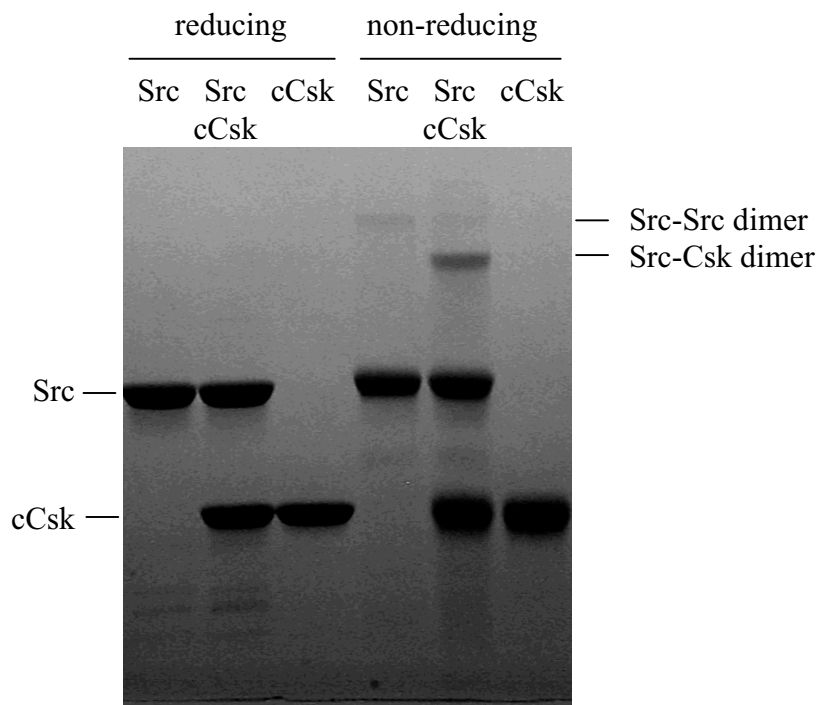

**Fig. S1.** Dimer formation between Src and catalytic domain of Csk. Src can form either a disulfide homodimer or a disulfide heterodimer with Csk. To determine which dimer is preferred, Src (10  $\mu$ g), the catalytic domain of Csk (cCsk, 10  $\mu$ g) or both (10  $\mu$ g each) were mixed in the presence of 1 mM DTT in 50 mM Tris (pH 8.0). The mixtures were then desalted on Sephadex G25 columns that were equilibrated with 0.1 mM H<sub>2</sub>O<sub>2</sub> in 50 mM Tris (pH 8.0). The protein fractions were analyzed by SDS/PAGE under either reducing (20 mL/mL  $\beta$ -mercaptoethanol) or nonreducing (no  $\beta$ -mercaptoethanol) conditions. Under the reducing condition, no dimer was detectable in Src, cCsk, or the mixture. Under the nonreducing condition, a Src homodimer was visible in Src and the Src-cCsk mixture. Significantly more Src-cCsk heterodimer than Src-Src homodimer was detected in the Src-cCsk mixture, indicating that the heterodimer was preferred. No cCsk dimer was detected even under the nonreducing condition. The catalytic domain of Csk, instead of full-length Csk, was used for this study so that the Src-Src homodimer and Src-Csk heterodimer could be distinguished by size. It is noted that the extent of Src dimer formation under these experimental conditions was not as prevalent as Src dimer formation when Src was directly purified under nonreducing conditions. It could be caused by interference by disulfide coupling between Src and DTT or incomplete removal of DTT.

**Table S1. Comparison of the amino acid sequences in the Gly loop in selected families of PTKs**

| Family | Kinase | Gly loop                 |
|--------|--------|--------------------------|
| Src    | Src    | G <b>Q</b> G <b>C</b> FG |
|        | Yes    | G <b>Q</b> G <b>C</b> FG |
|        | Fgr    | GTG <b>C</b> FG          |
|        | Blk    | G <b>S</b> G <b>Q</b> FG |
|        | Brk    | G <b>S</b> G <b>Y</b> FG |
|        | Frk    | G <b>S</b> G <b>Q</b> FG |
|        | Fyn    | G <b>N</b> G <b>Q</b> FG |
|        | Hck    | G <b>A</b> G <b>Q</b> FG |
|        | Lck    | G <b>A</b> G <b>Q</b> FG |
|        | Lyn    | G <b>A</b> G <b>Q</b> FG |
|        | FGFR   | FGFR1                    |
| FGFR2  |        | G <b>E</b> G <b>C</b> FG |
| FGFR3  |        | G <b>E</b> G <b>C</b> FG |
| FGFR4  |        | G <b>E</b> G <b>C</b> FG |
| Csk    | Csk    | G <b>K</b> G <b>E</b> FG |
|        | Chk    | G <b>E</b> G <b>E</b> FG |
| Ack    | Ack    | G <b>D</b> G <b>S</b> FG |
|        | Tnk1   | G <b>S</b> G <b>C</b> FG |

The Cys residues at the position equivalent to Src Cys277 are in bold. None of the other PTKs in the human kinome contain a Cys residue in this loop.
